# Supplementary material for: Identification and characterization of the maize arogenate dehydrogenase gene family
Source: PubMed Central journal article supplement — J Exp Bot. 2010 Jun 17;61(13):3663–73. doi: 10.1093/jxb/erq179 (PMC2921203; doi:10.1093/jxb/erq179), 2010-06-17
Supplement: erq179_1.pdf [file erq179_1.pdf]

## **Identification and characterization of the maize arogenate dehydrogenase gene family**

David R. Holding, Robert B. Meeley, Jan Hazebroek, David Selinger, Fred Gruis, Rudolf Jung and Brian A. Larkins

## Supplemental Figure 1. PCA metabolites in *arodh-1* and other W64A lines

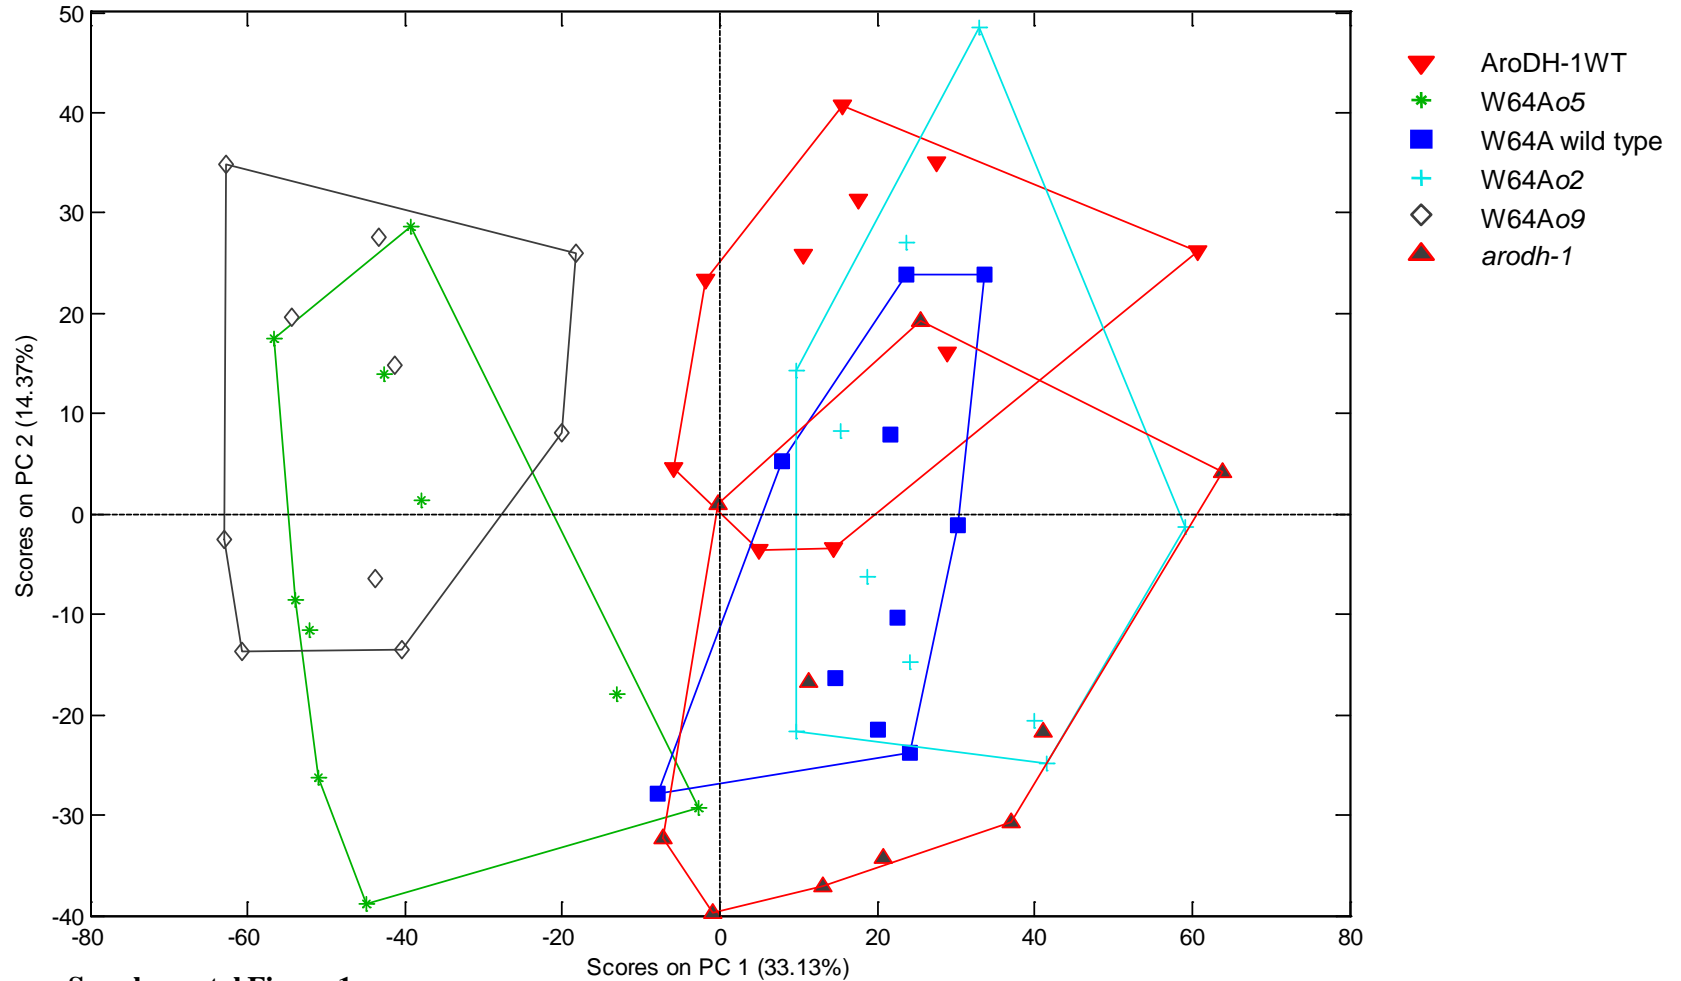

### Supplemental Figure 1

**Principle Component Analysis (PCA) scores plot of leaf tissue metabolite profiles obtained from W64A *arodh-1*, W64A *AroDH-1* wild-type isolate, W64Ao2, W64Ao5, W64o9 and W64A wild type.**

PCA was performed on the  $m/z$  value  $\times$  retention time matrix of metabolite fingerprinting data following Z-scoring using the Eigenvector PLS Toolbox software. Group boundaries for samples of each genotype are shown with solid lines. The W64Ao5 and W64Ao9 sample groups form a cluster that is distinct from W64A *arodh-1*, which overlaps with sample groups of W64A wild type and W64Ao2.

**Supplemental Figure 2.** Protein bound amino acid content of *arodh-1* mutant and wild type tissues

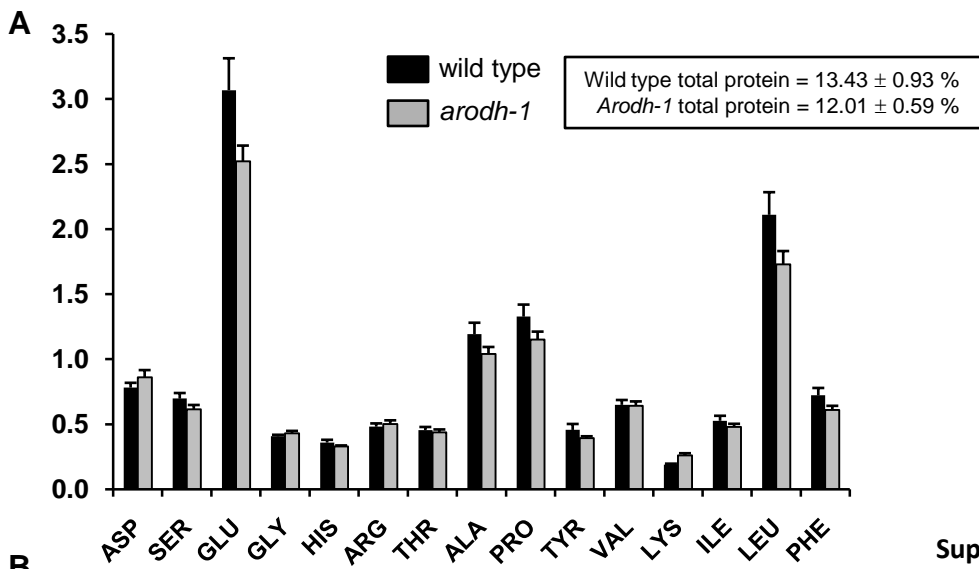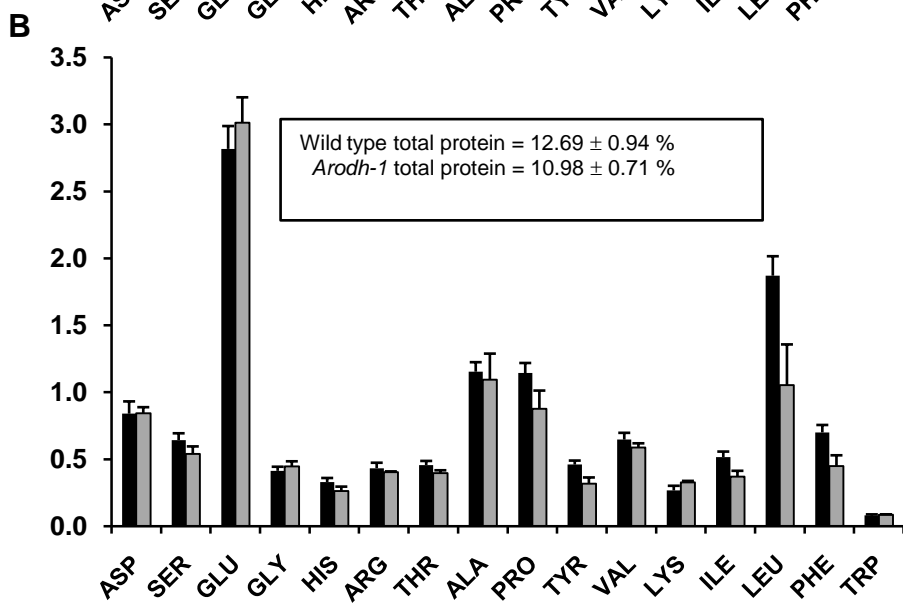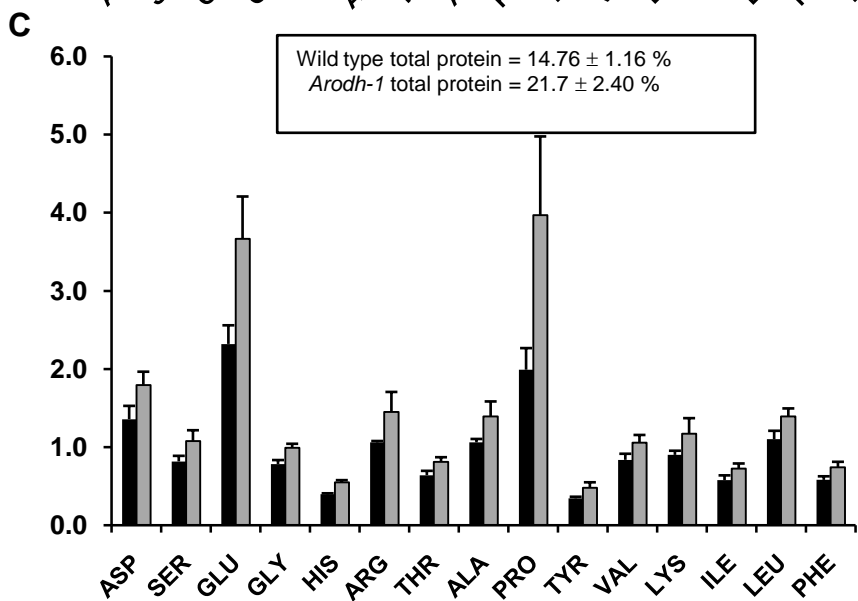

**Supplemental Figure 2**  
**Protein bound amino acid profiles**  
**of *arodh-1* mutant and wild type**  
**tissues**

A; mature endosperm, B; 20 DAP developing endosperm, C; 20 DAP developing embryo.

Key in A also refers to B and C. Values shown are % of endosperm dry weight  $\pm$  standard deviation (three biological replicates). Insert boxes showing total protein are also expressed as the percent of dry weight; tryptophan data were only available for developing endosperm samples.

**Supplemental table 1.** Data from MPSS analysis of Zm AroDH genes in wild type B73 maize tissues

|         | Chrm | Seed | Endosperm | Aleurone | Starchy endosperm | Chalazal endosperm | Embryo | Pericarp | Ear meristem | Silk | Tassel | Pollen | Anther | SAM | Leaf | Root | Stem |
|---------|------|------|-----------|----------|-------------------|--------------------|--------|----------|--------------|------|--------|--------|--------|-----|------|------|------|
| AroDH-1 | 5    | 233  | 129       | 74       | 28                | 240                | 23     | 178      | 133          | 89   | 0      | 0      | 128    | 175 | 274  | 534  | 286  |
| AroDH-2 | 5    | -    | -         | -        | -                 | -                  | -      | -        | 30           | 30   | -      | -      | -      | -   | 33   | -    | 22   |
| AroDH-3 | 6    | 49   | 27        | 82       | -                 | 96                 | -      | 72       | -            | 24   | 112    | -      | 187    | 11  | 448  | 459  | 336  |
| AroDH-4 | 9    | 20   | 78        | -        | -                 | 75                 | -      | -        | 13           | -    | -      | -      | -      | -   | 79   | 113  | -    |
